# Supplementary material for: Two novel DNA motifs are essential for BACE1 gene transcription
Source: PubMed Central journal article supplement (PMC4215305; doi:10.1038/srep06864), 2014-10-31
Supplement: srep06864-s1.pdf [file srep06864-s1.pdf]

## Two novel DNA motifs are essential for *BACE1* gene transcription

Yan Xiang, Shasha Meng, Jinfeng Wang, Songyang Li, JingruLiu, Hongmei Li, Tingyu Li, Weihong Song and Weihui Zhou

### SupplementaryMethods

#### Plasmid construction

Plasmids p3BU-1149/-400, p3BU-919/-400, p3BU-800/-400, p3BU-700/-400, p3BU-583/-400, p3BU-574/-400, p3BU-560/-400, p3BU-540/-400, p3BU-520/-400, p3BU-500/-400, p3BU-583/400M580T, p3BU-583/400M578A , p3BU-583/400M580T578A, p3BU-583/-420, p3BU-583/-440, p3BU-583/-460, p3BU-583/-480 were constructed by amplifying DNA fragments with corresponding primer pairs and DNA of p3BU-1273/-400 as template, resulted PCR products were inserted into pGL3-Basic at XhoI/HindIII sites. To construct plasmid p3BU-583/-500, p3BU-583/-510, p3BU-570/-480 p3BU-560/-480, p3BU-550/-480, p3BU-540/-480, p3BU-530/-480, p3BU-520/-480, p3BU-510/-480, DNA fragments were amplified with corresponding 5' phosphorylated primer pairs and DNA of p3BU-583/-480 as template, resulted PCR products were self-ligated to generate circle plasmids. To construct plasmid p3BU-583/-400M510C, p3BU-583/-400M482A and p3BU-583/-400M510C482A, DNA fragments were amplified with corresponding 5' phosphorylated primer pairs and DNA of p3BU-583/-400 as template, resulted PCR products were self-ligated to generate circle plasmids. To construct plasmid p3BU-583/-400M578A510C, p3BU-583/-400M578A482A, DNA fragments were amplified with corresponding 5' phosphorylated primer pairs and p3BU-583/-400M510C or p3BU-583/-400M482A as

templates, resulted PCR products were self-ligated to generate circle plasmids. To construct plasmid p3BU-1149/-400M578A, p3BU-1149/-400M510C , p3BU-1149/-400M482A, p3BU-1149/-400M578x, p3BU-1149/-400M578y, p3BU-1149/-400M578z, p3BU-1149/-400M510x, p3BU-1149/-400M510y, p3BU-1149/-400M510z, p3BU-1149/-400M550-551R, p3BU-1149/-400M550-551D, p3BU-1149/-400MIZ, p3BU-1149/-400TCE1R, p3BU-1149/-400InrM, DNA fragments were amplified with corresponding 5' phosphorylated primer pairs and DNA of p3BU-1149/-400 as template, resulted PCR products were self-ligated to generate circle plasmids. To construct plasmid p3BU-1149/-400M578A510C, p3BU-1149/-400M578A482A, DNA fragments were amplified with corresponding 5' phosphorylated primer pairs and p3BU-1149/-400M510C or p3BU-1149/-400M482A as templates and, resulted PCR products were self-ligated to generate circle plasmids. To construct plasmid pGL3basicEGFP, pGL3promoter-EGFP, p3BU-1149/400EGFP and p3BU-1149/400M578A510CEGFP, EGFP DNA fragment was amplified with primers CAGAAGCTTCGCCACCATGGTGAGCAAGG/CAGTCTAGATTACTTGTACAGCTCGTC and plasmid pEGFP-N2 as template, PCR product was inserted into plasmid pGL3-Basic, pGL3-Promoter, p3BU-1149/400 and p3BU-1149/400M578A510C at HindII/XbaI sites to replace luciferase gene . For construction of p3BU-584/-480R, DNA fragment of BACE1U-584/-480 was amplified with primer B1U-584fHind / B1U-480rXho and plasmid p3BU1149-400B as template. PCR product of B1U-584/-480 was inserted into pGL3basic at HindIII/XhoI . To construct plasmid pGL3p-TCE1, a pair of primers B1U583XhF/B1U573XhR that complementary with each other was annealed and inserted in front of SV40 promoter in pGL3-Promoter vector at XhoI site. For construction of other single nucleotide

substitution plasmids, DNA fragments were amplified with DNA of p3BU-1149/-400 as template and corresponding 5' phosphorylated primer pairs, resulted PCR products were self-ligated to generate circle plasmids. All plasmids were confirmed by DNA sequencing. Corresponding primers were listed in following Table.

| Plasmid name               | Forward primer                                        | Reverse primer                           |
|----------------------------|-------------------------------------------------------|------------------------------------------|
| p3BU-1149/-400             | B1U1149F:CCGCTCGAGCCAT<br>TTCTCCTCAGTC                | B1U400R:CACAAGCTTCCAC<br>CATAATCCAGCTCG  |
| p3BU-919/-400              | B1U919F:CCGCTCGAGCAATC<br>TCTGCTCGTGAA                | B1U400R                                  |
| p3BU-800/-400              | B1U800F:CCGCTCGAGACATC<br>GTATAGTGTGAAAC              | B1U400R                                  |
| p3BU-700/-400              | B1U700F:CCGCTCGAGCCTGG<br>CATACAGTGGGTG               | B1U400R                                  |
| p3BU-583/-400              | B1U583F:CCGCTCGAGCGGC<br>AGAGGGCATCCCAGAC             | B1U400R                                  |
| p3BU-574/-400              | B1U574F:CCGCTCGAGGCATC<br>CCAGACCCCTCTC               | B1U400R                                  |
| p3BU-560/-400              | B1U560F:CCGCTCGAGCCTCT<br>CCAGCCCCGGAAG               | B1U400R                                  |
| p3BU-540/-400              | B1U540F:CCGCTCGAGATTGC<br>TGCCATGGGAAG                | B1U400R                                  |
| p3BU-520/-400              | B1U520F:CCGCTCGAGTACAC<br>TTCCAGCGATCC                | B1U400R                                  |
| p3BU-500/-400              | B1U500F:CCGCTCGAGGGAA<br>AAGCGAAAACCTT                | B1U400R                                  |
| p3BU-583/-400M5<br>80T     | B1U583T580F:CCGCTCGAGC<br>GGTAGAGGGCATCCCAGAC         | B1U400R                                  |
| p3BU-583/-400M5<br>78A     | B1U583A578F:CCGCTCGAGC<br>GGCAAAGGGCATCCCAGAC         | B1U400R                                  |
| p3BU-583/-400M5<br>78A580T | B1U583T580A578F:CCGCTCG<br>AGCGGTAAAGGGCATCCCA<br>GAC | B1U400R                                  |
| p3BU-583/-420              | B1U583F                                               | B1U420R:CACAAGCTTGCTC<br>GCAGCTCCCGGGCG  |
| p3BU-583/-440              | B1U583F                                               | B1U440R:CACAAGCTTCTGG<br>GGAGGCGGAAAGAC  |
| p3BU-583/-460              | B1U583F                                               | B1U460R:CACAAGCTTGTGG<br>CGGCGGCTGTCAAAG |
| p3BU-583/-480              | B1U583F                                               | B1U480R:CACAAGCTTCAA<br>AAGGTTTTCGCTTTTC |

|                        |                                        |                                         |
|------------------------|----------------------------------------|-----------------------------------------|
| p3BU-583/-500          | p3BasicPF:AAGCTTGGCATTCCGGTAC          | B1U500PR:CTGGGATCGCTGGAAAGTG;           |
| p3BU-583/-510          | p3BasicPF                              | B1U510PR:TGGGAAGTGTAGTCTTCC             |
| p3BU-570/-480          | B1U570PF:CCCAGACCCCTCTCCAGCC           | p3BasicPR:CTCGAGCCCGGGCTAGCAC           |
| p3BU-560/-480          | B1U560PF:TCTCCAGCCCCGGAAGCCG           | p3BasicPR                               |
| p3BU-550/-480          | B1U-550PF:CGGAAGCCGGATTGCCTGC          | p3BasicPR                               |
| p3BU-540/-480          | B1U-540PF:ATTGCCTGCCATGGGAAGAC         | p3BasicPR                               |
| p3BU-530/-480          | B1U530PF:ATGGGAAGACTACACTTCC           | p3BasicPR                               |
| p3BU-520/-480          | B1U520PF:TACACTTCCCAGCGATCC            | p3BasicPR                               |
| p3BU-510/-480          | B1U510PF:AGCGATCCCAGGAAAAGC            | p3BasicPR                               |
| p3BU-583/-400M510C     | B1U482TF:AAAGCGAAAACCTTTGGCTTTGACAGC   | B1U510CMR:TCCCTGGGATCGCGGGGAAGTGTAGTCT  |
| p3BU-583/-400M482A     | B1U482AMF:AAAGCGAAAACCTTATGGCTTTGACAGC | B1U510AR:TCCCTGGGATCGCTGGGAAGTGTAGTCT   |
| p3BU-583/-400M510C482A | B1U482AMF                              | B1U510CMR                               |
| p3BU-583/-400M578A510C | B1U583CAf:CGGCAAGGGCATCCCAGAC          | p3BasicPR:                              |
| p3BU-583/-400M578A482A | B1U583CAf                              | p3BasicPR                               |
| p3BU-1149/-400M578A    | B1U583CAf                              | B1U584R:AGGTGGAGTCCGCCCTGC              |
| p3BU-1149/-400M510C    | B1U482TF                               | B1U510CMR                               |
| p3BU-1149/-400M482A    | B1U482AMF                              | B1U510AR                                |
| p3BU-1149/-400M578x    | B1U583PfMx:CAACAGAGGGCATCCCAGAC        | B1U584R                                 |
| p3BU-1149/-400M578y    | B1U583PfMy:CGGAGGAGGGCATCCCAGAC        | B1U584R                                 |
| p3BU-1149/-400M578z    | B1U583PfMz:CGGCAGTAGGGCATCCCAGAC       | B1U584R                                 |
| p3BU-1149/-400M510x    | B1U482TF                               | B1U510PrMx:TCCCTGGGATCGCTGGTTAGTGTAGTCT |
| p3BU-1149/-400M        | B1U482TF                               | B1U510PrMy:TCCCTGGGAT                   |

|                             |                                                 |                                               |
|-----------------------------|-------------------------------------------------|-----------------------------------------------|
| 510y                        |                                                 | CGCTTTGAAGTGTAGTCT                            |
| p3BU-1149/-400M<br>510z     | B1U482TF                                        | B1U510PrMz:TCCCTGGGAT<br>CTTTGGGAAGTGTAGTCT   |
| p3BU-1149/-400M<br>578A510C | B1U583CAf                                       | B1U584R                                       |
| p3BU-1149/-400M<br>578A482A | B1U583CAf:                                      | B1U584R                                       |
| p3BU-1149/-400M<br>550-551R | B1UR570-535PF:CCCCAGAC<br>CCCGGAAGCCGGATTGCC    | B1UR551-586PR:AGAGGTCG<br>GGATGCCCTCTGCCGAGG  |
| p3BU-1149/-400M<br>550-551D | B1U550PF:CGGAAGCCGGATT<br>GCCTGC                | B1U571PR:ATGCCCTCTGCC<br>GAGGTGG              |
| p3BU-584/-480Br             | B1U-584fHind: CACAAGCTTCG<br>GCAGAGGGCATCCCAGAC | B1U-480Xho: CCGCTCGAGC<br>AAAAGGTTT TCGCTTTTC |
| p3BU-1149/-400M<br>IZ       | MIZ F: CCTCTGCC<br>AGACCCCTCTCCAGC              | MIZ R: GCATCCCG<br>AGGTGGAGTCCGCC             |
| p3BU-1149/-400T<br>CE1R     | TCE1F: CTGCCATCC<br>CAGACCCCTCTCCAG             | TCE1R: AGGGCAGGT<br>GGAGTCCGCCCTGC AAG        |
| p3BU-1149/-400In<br>rM      | InrMF: TCACATCTCCCAGCGA<br>TCCCAG               | InrMR: TCTTCCCATGGCAGG<br>CAATC               |
| pGL3p-TCE1                  | B1U583XhF: TCGAGCGGCAGA<br>GGGCC,               | B1U573XhR: TCGAGGCCCTC<br>TGCCGC              |
| p3BU-1149/-400M<br>584A     | B1U-F583 CGGCAGAGGG<br>CATCCCAGAC               | B1U-R584T/A:<br>TGGTGGAGTC CGCCCTGC           |
| p3BU-1149/-400M<br>584C     | B1U-F583                                        | B1U-R584T/C:<br>GGGTGGAGTC CGCCCTGC           |
| p3BU-1149/-400M<br>584G     | B1U-F583                                        | B1U-R584T/G:<br>CGGTGGAGTC CGCCCTGC           |
| p3BU-1149/-400M<br>583A     | B1U-F583C/A: AGGCAG<br>AGGGCATCCCAGAC           | B1U-R584: AGGTGG<br>AGTCCGCCCTGC              |
| p3BU-1149/-400M<br>583T     | B1U-F583C/T: TGGCAG<br>AGGGCATCCCAGAC           | B1U-R584                                      |
| p3BU-1149/-400M<br>583G     | B1U-F583C/G: GGGCAGAGGG<br>CATCCCAGAC           | B1U-R584                                      |
| p3BU-1149/-400M<br>582A     | B1U-F582G/A: CAGCAGAGGG<br>CATCCCAGAC           | B1U-R584                                      |
| p3BU-1149/-400M<br>582T     | B1U-F582G/T: CTGCAGAGGGC<br>ATCCCAGAC           | B1U-R584                                      |
| p3BU-1149/-400M<br>582C     | B1U-F582G/C: CCGCAGAGGG<br>CATCCCAGAC           | B1U-R584                                      |
| p3BU-1149/-400M<br>581A     | B1U-F581G/A: CGACAGAGGG<br>CATCCCAGAC           | B1U-R584                                      |
| p3BU-1149/-400M<br>581C     | B1U-F581G/C: CGCCAGAGGG<br>CATCCCAGAC           | B1U-R584                                      |

|                         |                                        |                                   |
|-------------------------|----------------------------------------|-----------------------------------|
| p3BU-1149/-400M<br>581T | B1U-F581G/T:CGTCAGAGGG<br>CATCCCAGAC   | B1U-R584                          |
| p3BU-1149/-400M<br>580A | B1U-F580C/A:CGGAAGAGGG<br>CATCCCAGAC   | B1U-R584                          |
| p3BU-1149/-400M<br>580T | B1U-F580C/T:CGGTAGAGGGC<br>ATCCCAGAC   | B1U-R584                          |
| p3BU-1149/-400M<br>580G | B1U-F580C/G:CGGGAGAGGG<br>CATCCCAGAC   | B1U-R584                          |
| p3BU-1149/-400M<br>579C | B1U-F579A/C:CGGCCGAGGG<br>CATCCCAGAC   | B1U-R584                          |
| p3BU-1149/-400M<br>579T | B1U-F579A/T:CGGCTG<br>AGGGCATCCCAGAC   | B1U-R584                          |
| p3BU-1149/-400M<br>579G | B1U-F579A/G:CGGCGG<br>AGGGCATCCCAGAC   | B1U-R584                          |
| p3BU-1149/-400M<br>578C | B1U-F578G/C:CGGCAC<br>AGGGCATCCCAGAC   | B1U-R584                          |
| p3BU-1149/-400M<br>578T | B1U-F578G/T:CGGCAT<br>AGGGCATCCCAGAC   | B1U-R584                          |
| p3BU-1149/-400M<br>577C | B1U-F577A/C:CGGCAGCGGG<br>CATCCCAGAC   | B1U-R584                          |
| p3BU-1149/-400M<br>577T | B1U-F577A/T:CGGCAGTGGGC<br>ATCCCAGAC   | B1U-R584                          |
| p3BU-1149/-400M<br>577G | B1U-F577A/G:CGGCAGGGGG<br>CATCCCAGAC   | B1U-R584                          |
| p3BU-1149/-400M<br>576A | B1U-F576G/A:CGGCAG<br>AAGGCATCCCAGAC   | B1U-R584                          |
| p3BU-1149/-400M<br>576T | B1U-F576G/T:CGGCAGATGGC<br>ATCCCAGAC   | B1U-R584                          |
| p3BU-1149/-400M<br>576C | B1U-F576G/C:CGGCAGACGG<br>CATCCCAGAC   | B1U-R584                          |
| p3BU-1149/-400M<br>575A | B1U-F575G/A:CGGCAG<br>AGAGCATCCCAGAC   | B1U-R584                          |
| p3BU-1149/-400M<br>575T | B1U-F575G/T:CGGCAG<br>AGTGCATCCCAGAC   | B1U-R584                          |
| p3BU-1149/-400M<br>575C | B1U-F575G/C:CGGCAG<br>AGCGCATCCCAGAC   | B1U-R584                          |
| p3BU-1149/-400M<br>574T | B1U-F574G/T:TCATCCCAGAC<br>CCCTCTCCAGC | B1U-R575:CCTCTG<br>CCGAGGTGGAGTCC |
| p3BU-1149/-400M<br>574C | B1U-F574G/C:CCATCCCAGAC<br>CCCTCTCCAGC | B1U-R575                          |
| p3BU-1149/-400M<br>574A | B1U-F574G/A:ACATCCCAGAC<br>CCCTCTCCAGC | B1U-R575                          |
| p3BU-1149/-400M         | B1U-F573C/T:GTATCCCAGAC                | B1U-R575                          |

|                         |                                          |                                      |
|-------------------------|------------------------------------------|--------------------------------------|
| 573T                    | CCCTCTCCAGC                              |                                      |
| p3BU-1149/-400M<br>573G | B1U-F573C/G:GGATCCCAGAC<br>CCCTCTCCAGC   | B1U-R575                             |
| p3BU-1149/-400M<br>573A | B1U-F573C/A:GAATCCCAGAC<br>CCCTCTCCAGC   | B1U-R575                             |
| p3BU-1149/-400M<br>572T | B1U-F572A/T:GCTTCCCAGAC<br>CCCTCTCCAGC   | B1U-R575                             |
| p3BU-1149/-400M<br>572C | B1U-F572A/C:GCCTCCCAGAC<br>CCCTCTCCAGC   | B1U-R575                             |
| p3BU-1149/-400M<br>572G | B1U-F572A/G:GCGTCCCAGAC<br>CCCTCTCCAGC   | B1U-R575                             |
| p3BU-1149/-400M<br>516A | B1U-F516C/A:TACAA<br>TCCCAGCGATCCCAGG    | B1U-R521:GTCCTTCCCATGG<br>CAGGCAATC  |
| p3BU-1149/-400M<br>516T | B1U-F516C/T:TACATTTCCCA<br>GCGATCCCAGG   | B1U-R521                             |
| p3BU-1149/-400M<br>516G | B1U-F516C/G:TACAGTTCCCA<br>GCGATCCCAGG   | B1U-R521                             |
| p3BU-1149/-400M<br>515A | B1U-F515T/A:TACACA<br>TCCCAGCGATCCCAGG   | B1U-R521                             |
| p3BU-1149/-400M<br>515C | B1U-F515T/C:TACACC<br>TCCCAGCGATCCCAGG   | B1U-R521                             |
| p3BU-1149/-400M<br>515G | B1U-F515T/G:TACACG<br>TCCCAGCGATCCCAGG   | B1U-R521                             |
| p3BU-1149/-400M<br>514A | B1U-F514T/A:ACCCAGC<br>GATCCCAGGGAAAAGC  | B1U-R515:AGTGTAG<br>TCTTCCCATGGCAGGC |
| p3BU-1149/-400M<br>514C | B1U-F514 T/C:CCCCAGC<br>GATCCCAGGGAAAAGC | B1U-R515                             |
| p3BU-1149/-400M<br>514G | B1U-F514 T/G:GCCCAGC<br>GATCCCAGGGAAAAGC | B1U-R515                             |
| p3BU-1149/-400M<br>513A | B1U-F513C/A:TACCAGC<br>GATCCCAGGGAAAAGC  | B1U-R515                             |
| p3BU-1149/-400M<br>513T | B1U-F513C/T:TCCAGC<br>GATCCCAGGGAAAAGC   | B1U-R515                             |
| p3BU-1149/-400M<br>513G | B1U-F513C/G:TGCCAGC<br>GATCCCAGGGAAAAGC  | B1U-R515                             |
| p3BU-1149/-400M<br>512G | B1U-F512C/G:TCGCAGC<br>GATCCCAGGGAAAAGC  | B1U-R515                             |
| p3BU-1149/-400M<br>512A | B1U-F512C/A:TCACAGC<br>GATCCCAGGGAAAAGC  | B1U-R515                             |
| p3BU-1149/-400M<br>512T | B1U-F512C/T:TCTCAGC<br>GATCCCAGGGAAAAGC  | B1U-R515                             |
| p3BU-1149/-400M<br>511A | B1U-F511C/A:TCCAAGC<br>GATCCCAGGGAAAAGC  | B1U-R515                             |

|                         |                                         |                                |
|-------------------------|-----------------------------------------|--------------------------------|
| p3BU-1149/-400M<br>511T | B1U-F511C/T:TCCTAGC<br>GATCCCAGGGAAAAGC | B1U-R515                       |
| p3BU-1149/-400M<br>511G | B1U-F511C/G:TCCGAGC<br>GATCCCAGGGAAAAGC | B1U-R515                       |
| p3BU-1149/-400M<br>510G | B1U-F510A/G:TCCCUGC<br>GATCCCAGGGAAAAGC | B1U-R515                       |
| p3BU-1149/-400M<br>510T | B1U-F510A/T:TCCCTGC<br>GATCCCAGGGAAAAGC | B1U-R515                       |
| p3BU-1149/-400M<br>509C | B1U-F509G/C:CCCACC<br>GATCCCAGGGAAAAGC  | B1U-R515                       |
| p3BU-1149/-400M<br>509A | B1U-F509G/A:CCCAAC<br>GATCCCAGGGAAAAGC  | B1U-R515                       |
| p3BU-1149/-400M<br>509T | B1U-F509G/T:TCCCATC<br>GATCCCAGGGAAAAGC | B1U-R515                       |
| p3BU-1149/-400M<br>508A | B1U-F508C/A:CCCAGA<br>GATCCCAGGGAAAAGC  | B1U-R515                       |
| p3BU-1149/-400M<br>508T | B1U-F508C/T:CCCAGT<br>GATCCCAGGGAAAAGC  | B1U-R515                       |
| p3BU-1149/-400M<br>508G | B1U-F508C/G:CCCAGG<br>GATCCCAGGGAAAAGC  | B1U-R515                       |
| p3BU-1149/-400M<br>507A | B1U-F507G/A:AATCCCAGGG<br>AAAAGCGAA     | B1U-R508:CTGGGA<br>AGTGTAGTCTT |
| p3BU-1149/-400M<br>507T | B1U-F507G/T:TATCCCAGGGA<br>AAAGCGAA     | B1U-R508                       |
| p3BU-1149/-400M<br>507C | B1U-F507G/C:CATCCCAGGGA<br>AAAGCGAA     | B1U-R508                       |
| p3BU-1149/-400M<br>506T | B1U-F506A/T:<br>GTTCCCAGGGAAAAGCGAA     | B1U-R508                       |
| p3BU-1149/-400M<br>506C | B1U-F506A/C:<br>GCTCCCAGGGAAAAGCGAA     | B1U-R508                       |
| p3BU-1149/-400M<br>506G | B1U-F506A/G:<br>GGTCCCAGGGAAAAGCGAA     | B1U-R508                       |
| p3BU-1149/-400M<br>505A | B1U-F505T/A:<br>GAACCCAGGGAAAAGCGAA     | B1U-R508                       |
| p3BU-1149/-400M<br>505C | B1U-F505T/C:<br>GACCCAGGGAAAAGCGAA      | B1U-R508                       |
| p3BU-1149/-400M<br>505G | B1U-F505T/G:<br>GAGCCAGGGAAAAGCGAA      | B1U-R508                       |
